# Supplementary material for: Sustainable, Highly Efficient and Superhydrophobic Fluorinated Silica Functionalized Chitosan Aerogel for Gravity-Driven Oil/Water Separation
Source: MDPI journal article supplement (doi:10.3390/gels7020066), 2021-06-02
Supplement: s1 [file s1]

# Sustainable, Highly Efficient and Superhydrophobic Fluorinated Silica Functionalized Chitosan Aerogel Gravity-Driven Oil/Water Separation

Zhongjie Zhu <sup>1</sup>, Lei Jiang <sup>2</sup>, Jia Liu <sup>2</sup>, Sirui He <sup>2</sup> and Wei Shao <sup>1,2,\*</sup>

<sup>1</sup> Jiangsu Co-Innovation Center of Efficient Processing and Utilization of Forest Resources, Nanjing Forestry University, Nanjing 210037, China; 13382367651@163.com

<sup>2</sup> College of Chemical Engineering, Nanjing Forestry University, Nanjing 210037, China; 15655679696@163.com (L.J.); 117863961252@163.com (J.L.); he\_1327313536@163.com (S.H.)

\* Correspondence: w.shao@njfu.edu.cn; Tel.: +86-25-85427024

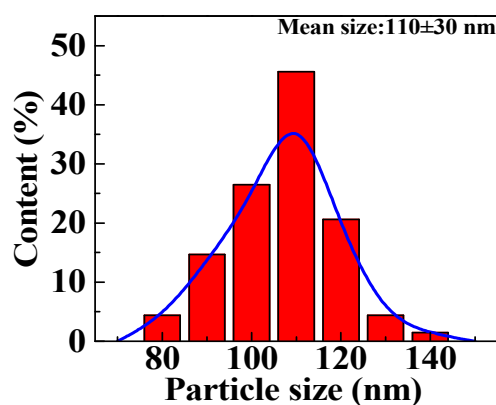

Figure S1. The size distribution of F-silica nanoparticles.

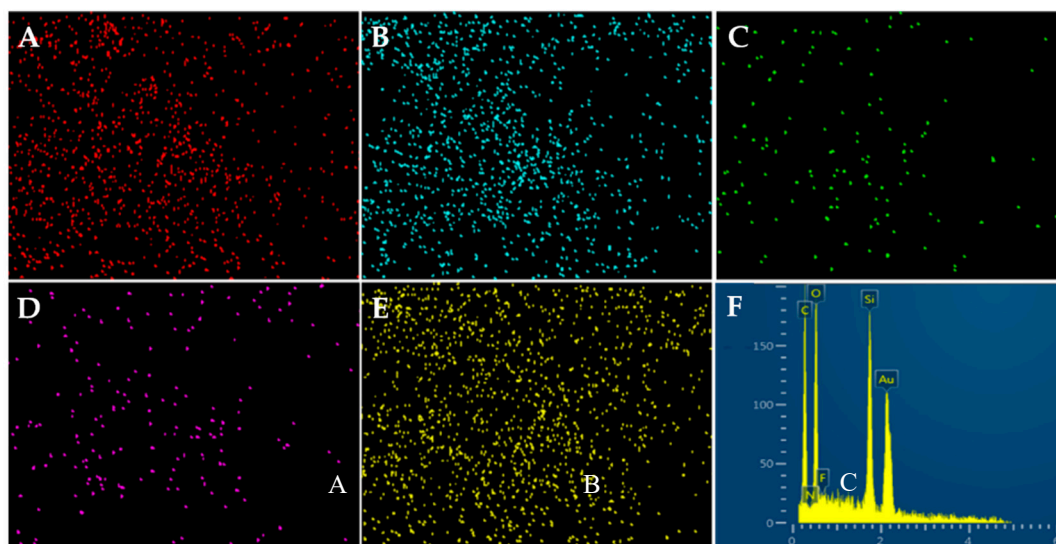

Figure S2. Element mappings of C (A), O (B), N (C), F (D), Si (E) and EDS spectrum (F) of F-CS aerogel.

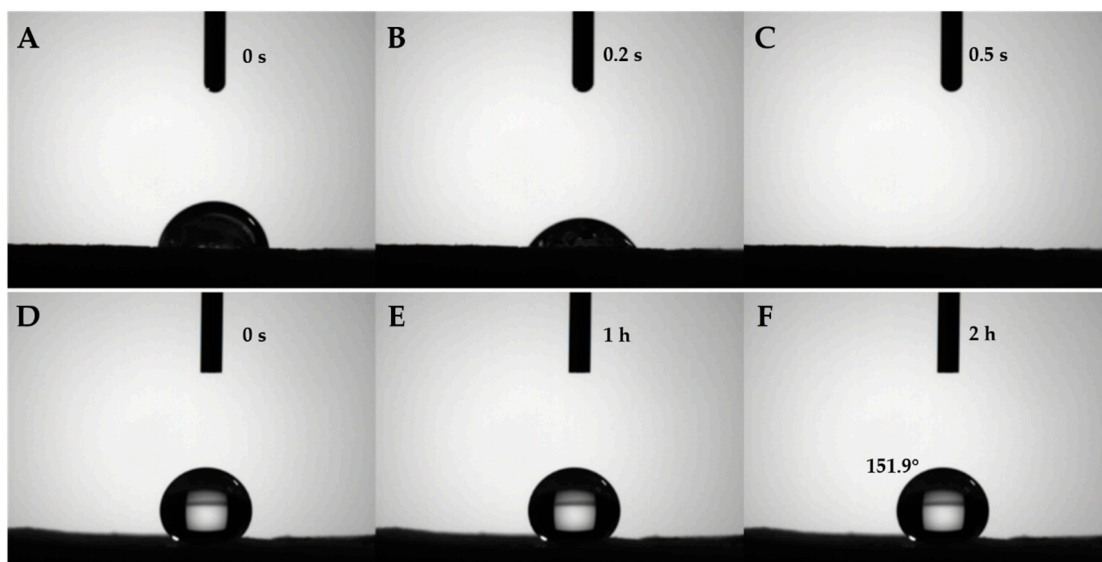

Figure S3. The sequential WCA pictures of CS (A-C) and F-CS (D-F) aerogels.

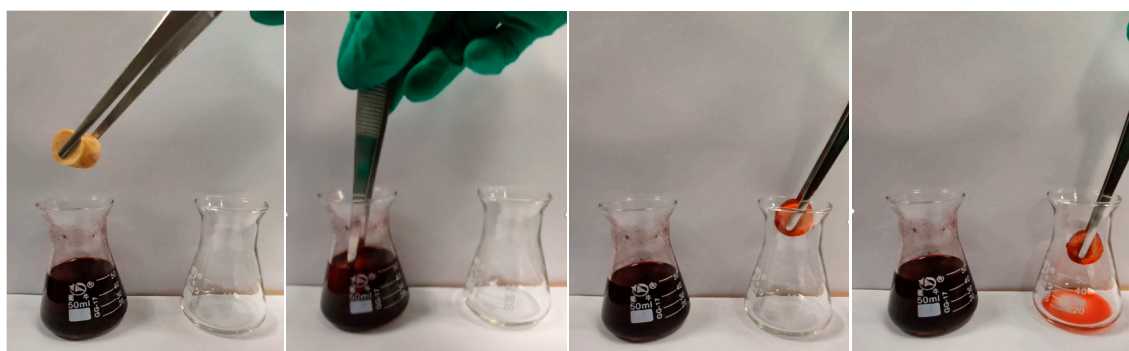

Figure S4. The collection process of the absorbed oil.

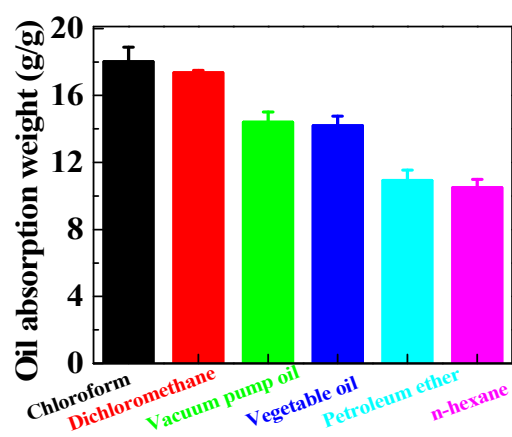

Figure S5. The oil absorption weights of F-CS aerogel.

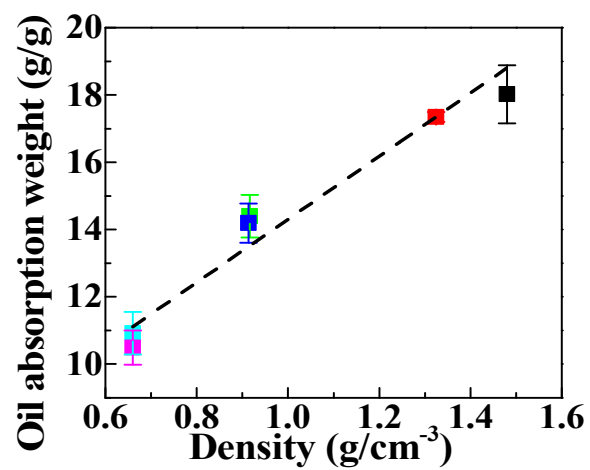

**Figure S6.** The relationship between the oil density and the absorption weight of F-CS aerogel.
